# Supplementary material for: Reporting incidents involving the use of advanced medical technologies by nurses in home care: a cross-sectional survey and an analysis of registration data
Source: HighWire-hosted journal article supplement (doi:10.1136/bmjqs-2019-010510), 2020-06-16
Supplement: bmjqs-2019-010510supp001_data_supplement.pdf [file bmjqs-2019-010510supp001_data_supplement.pdf]

## Appendix 1. Questionnaire home care nurses

---

What is your respondent number: .....

Date: .....

What is your age? ..... year

What is your gender?

female

male

What is the highest level of education in nursing that you have completed?

in-service education

secondary vocational education

higher professional education with a bachelor degree

other, namely .....

Which extra or specialized education in nursing have you possibly completed?

.....

What is the scope of your employment in FTE (rounded)?

0,1 FTE

0,2 FTE

0,3 FTE

0,4 FTE

0,5 FTE

0,6 FTE

0,7 FTE

0,8 FTE

0,9 FTE

1 FTE

Which situation is *most* applicable to your work?

- I work as a nurse who usually performs various tasks of care for patients at home, including the care with advanced medical technologies (such as infusion therapy, parenteral nutrition or morphine pumps) if necessary.
- I work as a specialized nurse who performs specific tasks for patients at home using advanced medical technologies.

How many years of practical experience do you have in total (in inpatient and outpatient care) with regard to the use of the following medical technologies, regardless of the type:

|                      | Never used it | Less than 6 months | 6-12 months | 1-2 year | More than 2 years |
|----------------------|---------------|--------------------|-------------|----------|-------------------|
| Infusion therapy     | 0             | 0                  | 0           | 0        | 0                 |
| Parenteral nutrition | 0             | 0                  | 0           | 0        | 0                 |
| Morphine pump        | 0             | 0                  | 0           | 0        | 0                 |

How often do you use the following medical technologies on average **in home care**?  
(almost) daily = (almost) every shift

|                      | (Almost) daily/(almost) every shift | Several times a month | A few times every six months | Several times a year | Less than once a year | Never used it |
|----------------------|-------------------------------------|-----------------------|------------------------------|----------------------|-----------------------|---------------|
| Infusion therapy     | 0                                   | 0                     | 0                            | 0                    | 0                     | 0             |
| Parenteral nutrition | 0                                   | 0                     | 0                            | 0                    | 0                     | 0             |
| Morphine pump        | 0                                   | 0                     | 0                            | 0                    | 0                     | 0             |

To what extent do you consider yourself competent of using the following medical technologies safely in the home setting?

|                      | Very competent | Sufficiently competent | Insufficiently competent | Very incompetent |
|----------------------|----------------|------------------------|--------------------------|------------------|
| Infusion therapy     | 0              | 0                      | 0                        | 0                |
| Parenteral nutrition | 0              | 0                      | 0                        | 0                |
| Morphine pump        | 0              | 0                      | 0                        | 0                |
